# Supplementary material for: Exploring the Diversity of Active Ureolytic Bacteria in the Rumen by Comparison of cDNA and gDNA
Source: MDPI journal article supplement (doi:10.3390/ani10112162), 2020-11-20
Supplement: s1 [file s1]

## Supplementary Materials

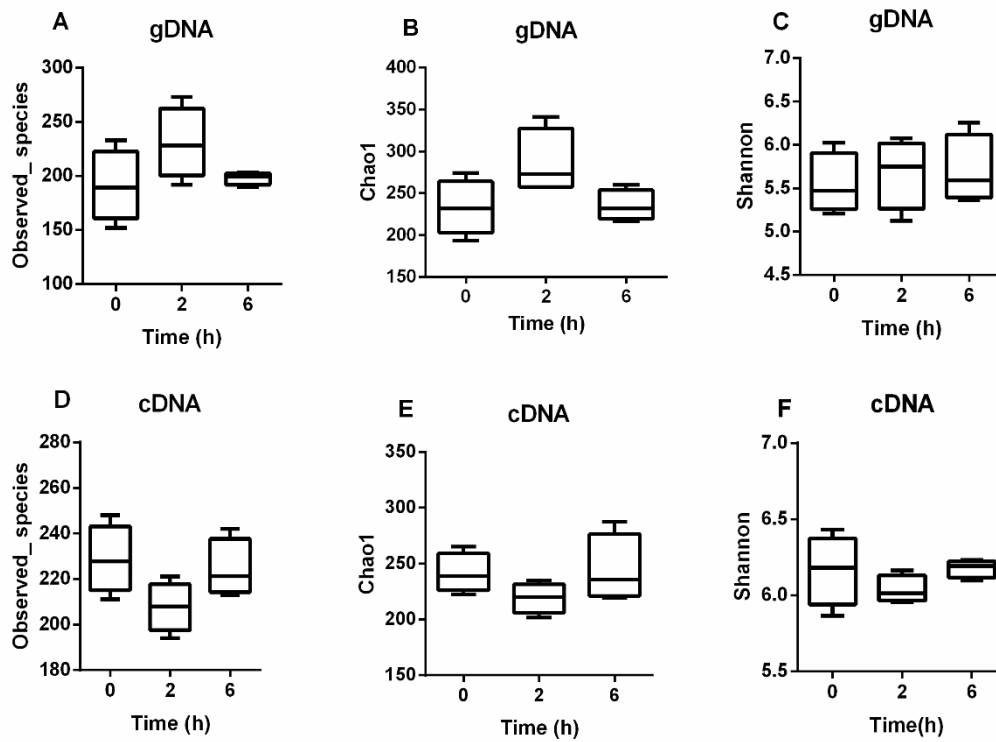

**Figure 1.** Alpha diversity of rumen ureolytic bacteria of gDNA and cDNA across different time. (A) Total observed species (B) Chao1 and, (C) Shannon index on gDNA. (D) Total observed species (E) Chao1 and, (F) Shannon index on cDNA. Boxplots indicate the first and third quartiles with the median value indicated as a horizontal line the whiskers extend to 1.5 times the inter quartile range.
